1 **Effects of agrochemicals on disease severity of *Acanthostomum burminis* infections**  
2 **(Digenea: Trematoda) in the Asian common toad, *Duttaphrynus melanostictus***

---

3 Uthpala A. Jayawardena<sup>1,2</sup>, Jason R. Rohr<sup>3</sup>, Priyanie H. Amerasinghe<sup>4</sup> Ayanthi N. Navaratne<sup>5</sup>  
4 and, Rupika S. Rajakaruna<sup>2\*</sup>

5 1 Postgraduate Institute of Science, University of Peradeniya, Peradeniya, Sri Lanka.

6 [uthpala57@yahoo.com](mailto:uthpala57@yahoo.com)

7 2 Department of Zoology, University of Peradeniya, Peradeniya, Sri Lanka.

8 3 Department of Integrative Biology, University of South Florida, Tampa, FL, USA

9 4 International Water Management Institute, C/o ICRISAT, Patancheru – 502, 324,  
10 Hyderabad, Andhra Pradesh, India. [P.H.Amerasinghe@cgiar.org](mailto:P.H.Amerasinghe@cgiar.org)

11 5 Department of Chemistry, University of Peradeniya, Peradeniya, Sri Lanka.

12 [ayanthin@pdn.ac.lk](mailto:ayanthin@pdn.ac.lk)

13

14 \*corresponding author: Rupika S. Rajakaruna, [rupikar@pdn.ac.lk](mailto:rupikar@pdn.ac.lk)

15

16 **Abstract**

17 **Background:** Agrochemicals are widely used in many parts of the world posing direct and  
18 indirect threats to organisms. Xenobiotic-related disease susceptibility is a common phenomenon  
19 and a proposed cause of amphibian declines and malformations. For example, parasitic infections  
20 combined with pesticides generally pose greater risk to both tadpoles and adult frogs than either  
21 factor alone. Here, we report on experimental effects of lone and combined exposures to  
22 cercariae of the digenetic trematode *Acanthostomum burminis* and ecologically relevant  
23 concentrations of (0.5 ppm) four pesticides (insecticides: chlorpyrifos, dimethoate; herbicides:  
24 glyphosate, propanil) on the tadpoles and metamorphs of the Asian common toad, *Duttaphrynus*  
25 *melanostictus*.

26 **Results:** All 48 cercariae successfully penetrated each host suggesting that the pesticides had no  
27 short-term detrimental effect on cercarial penetration abilities. When the two treatments were  
28 provided separately, both cercariae and pesticides significantly decreased the survival of tadpoles  
29 and metamorphs and increased developmental malformations, such as scoliosis, kyphosis, and  
30 skin ulcers. Exposure to cercariae and the two insecticides additively reduced host survival. In  
31 contrast, mortality associated with the combination of cercariae and herbicides was less than  
32 additive. The effect of cercariae on malformation incidence depended on the pesticide treatment;  
33 dimethoate, glyphosate, and propanil reduced the number of cercarial-induced malformations  
34 relative to both the control and chlorpyrifos treatments.

35 **Conclusions:** These results show that ecologically relevant concentrations of the tested  
36 agrochemicals had minimal effects on trematode infections, in contrast to others studies which  
37 showed that these same treatments increased the adverse effects of these infections on tadpoles  
38 and metamorphs of the Asian common toad. These findings reinforce the importance of

39 elucidating the complex interactions among xenobiotics and pathogens on sentinel organisms  
40 that may be indicators of risk to other biota.

41 **Key words:** Amphibians, Trematodes, Glyphosate, Chlorpyrifos, Dimethoate, Propanil,  
42 Malformation

### 43 **Background**

44 Amphibian populations in many parts of the world are experiencing declines and malformations  
45 owing to multiple causes, such as xenobiotics, diseases, radiation, habitat destruction, and  
46 climate change. [1,2]. Among these causes, considerable attention has been paid to the effects of  
47 chemical contaminants on disease risk [3-7]. Amphibians prefer to live in littoral zones of  
48 wetland or aquatic ecosystems where there is a high potential exposure to agrochemicals [8] as  
49 the pesticides can travel over large expanses as high as 1,000 km affecting it life cycle stages [9,  
50 10].

51 Many studies conducted on effects of xenobiotic on amphibians have focused on direct  
52 mortality and developmental defects that might contribute to population declines [12-15]. For  
53 instance, the direct mortality of late stage larvae of green frogs (*Rana clamitans*) and spring  
54 peepers (*Pseudacris crucifer*) was studied by exposing them to 3 ppb of the insecticide carbaryl  
55 [16]. Relyea *et al.* [12] reported that exposure to 380 ppb of the herbicide glyphosate (Roundup)  
56 resulted in a 40% decline in the survivorship of American toad (*Bufo americanus*), leopard frog  
57 (*Rana pipiens*), and gray tree frog (*Hyla versicolor*) tadpoles. Other than effects on survival,  
58 growth reductions due to pesticide exposure can potentially reduce population growth rates of  
59 amphibians [12]. Furthermore, pesticides may delay or accelerate amphibian metamorphosis [17-  
60 19]; delays could cause mass mortality events if the waterbody dries up before metamorphosis

61 and accelerated metamorphosis can compromise the immune capacity of metamorphs [20]. In  
62 addition to this indirect effect on immunity, pesticides can also be directly immunotoxic  
63 increasing susceptibility to infectious diseases [21].

64 Infectious diseases are particularly important because they are well-documented,  
65 widespread causative agents of amphibian population declines [22-24]. Among the amphibian  
66 infectious diseases, those caused by trematode infections have received much interest [23, 25,  
67 26]. Deformed amphibians and associated mass mortality events became a major environmental  
68 issue during the late 1990's [4] and later on, trematode infections were identified as the major  
69 cause of many of these deformities [27-30]. By deforming their hosts, the trematodes are  
70 believed to enhance the chances that the intermediate host is depredated by a vertebrate  
71 definitive host, thus facilitating their life cycle completion [the handicapped frog hypothesis; 4,  
72 31].

73 Agrochemicals consistently seem to affect interactions between amphibian hosts and  
74 trematode parasites [4]. For example, *Echinostoma trivolvis* infection of cricket frogs has  
75 increased in areas with detectable levels of herbicides in Midwestern United States [33].  
76 Similarly, *E. trivolvis* infection in *Rana clamitans* has increased in areas closer to nutrient and  
77 where other chemical inputs were high [26]. To corroborate these findings, Rohr and colleagues  
78 [34] demonstrated that the trematode infections were higher in amphibians exposed to atrazine,  
79 glyphosate, carbaryl, and malathion. Furthermore, elevated levels of nitrogen and phosphorous  
80 associated with fertilizer use increased amphibian trematode infections [34, 36].

81 In this study, we examined the effects of *Acanthostomum burminis* infections in the  
82 tadpoles and metamorphs of the Asian common toad, *Duttaphrynus melanostictus* in the

83 presence of four pesticides: two herbicides (glyphosate and propanil), and two insecticides  
84 (chlorpyrifos and dimethoate). Individual effects of these pesticides on *A. burminis* infections in  
85 the same developmental stages of the hourglass tree frog, *Polypedates cruciger*, and *D.*  
86 *melanostictus* were previously reported [36-40]. In these species, *A. burminis* induced mainly  
87 axial and some limb malformations, increased mortality and time to metamorphosis, and  
88 decreased size at metamorphosis [36, 37, 40], whereas the four pesticides increased  
89 malformations, mortality, and time to metamorphosis [38, 39]. Many laboratory studies suggest  
90 that in the presence of pesticides, trematode-induced effects are enhanced [41-44]. Recently,  
91 exposure to the combination of cercariae of *A. burminis* and pesticides revealed that the two  
92 factors pose greater risks to frogs than either factor alone [45]. Despite earlier findings that  
93 cercariae are often sensitive to chemical contaminants [46-48], all the cercariae entered the  
94 tadpole in both the control and pesticide treatments, indicating that there was no pesticide-  
95 induced mortality of the cercariae before they could infect [45]. Whereas previous work on *D.*  
96 *melanostictus* explored the effects of pesticides and *A. burminis* in isolation only, here we build  
97 upon work that suggests that pesticide exposure can enhance trematode infection by crossing the  
98 presence and absence of pesticides with the presence and absence of *A. burminis* to test whether  
99 pesticides increase or decrease risk from this infection in *D. melanostictus*. Consequently, this  
100 work will help move the field towards a more general conclusion regarding the risk that the  
101 combined effect of the pesticides and cercariae pose to amphibians.

## 102 **METHODS**

### 103 *Study animals*

104 The Asian common toad, *Duttaphrynus melanostictus* is a least concerned species, distributed all  
105 over Sri Lanka, especially in human-altered habitats. The adults lay egg strands in slow-flowing

106 streams or in water pools. Four newly spawned egg masses of *D. melanostictus* were collected  
107 from ponds in the Peradeniya University Park (7°15'15"N 80°35'48"E / 7.25417°N 80.59667°E)  
108 and were brought to the research facility in the Department of Zoology, University of  
109 Peradeniya, Sri Lanka. The egg masses were placed in a glass aquarium containing dechlorinated  
110 tap water. Tadpoles were fed ground fish flakes twice a day (~10% body mass). The debris and  
111 faeces that collected at the bottom of the aquaria were siphoned out and water level was  
112 replenished daily. Water temperature was maintained around 27° -30° C and pH was maintained  
113 around 6.5-7.0.

114       Adults of *Acanthostomum burminis* reproduce sexually in the common freshwater snake  
115 [40] and release eggs in the excrement of these hosts. Miracidiae, a free-living larval stage,  
116 hatch when the eggs encounter water and search for the first intermediate host, a snail. Once in  
117 the snail host, they reproduce asexually and a second free-living larval stage, cercaria, is  
118 released. Cercariae search for their second intermediate host, which is an amphibian. The  
119 cercariae encyst subcutaneously as metacercariae in amphibians. When an infected amphibian is  
120 consumed by a water snake, the life cycle is completed.

121       Pleurolophocercous cercariae of *A. burminis* released from the freshwater snail species  
122 *Thiara scabra* (Family: Thiaridae) were used for the trematode exposures in this experiment.  
123 *Thiara scabra* is a common freshwater snail, found associated with muddy/sandy bottom closer  
124 to riverine vegetation [49]. *Thiara scabra* were collected from the university stream and were  
125 kept in plastic vials containing 10–15 mL of dechlorinated tap water, under sunlight to induce  
126 cercarial shedding. The snails that were shedding cercariae were kept individually in separate  
127 vials to obtain a continuous supply of cercariae for the exposures. One infected snail was used  
128 for all the tadpole exposures per clutch. Thus, four source snails were used to expose the

129 tadpoles from the four clutches of toads. This is advantageous because the blocking factor  
130 removes variation from the error term that is due to both the source of the tadpoles (clutch) and  
131 the source of the cercariae (snail), increasing statistical power to detect an effect of treatments.

### 132 *Test chemicals*

133 The tadpoles and cercariae were exposed to commercial formulations of four widely used  
134 agrochemicals; two organophosphorous insecticides (chlorpyrifos and dimethoate) and two  
135 herbicides (glyphosate and propanil). The concentration of the active ingredient (a.i.) tested and  
136 any known surfactants in the commercial formulation were given in Table 1. The test  
137 concentrations (0.5 ppm) for each pesticide were selected based on available literature [50, 51]  
138 and information from Pesticide Registrar Office in Peradeniya on field concentrations of these  
139 chemicals.

### 140 *Exposure of tadpoles to cercariae and pesticides*

141 Each tadpole (5 days post-hatch, Gosner stages 25–26 [52]) was placed in a separate specimen  
142 cup containing 15–20 mL of test solution (dechlorinated tap water/ 0.5 ppm- chlorpyrifos/  
143 dimethoate/ glyphosate/ propanil). Tadpoles assigned to receive trematodes (Table 2) were  
144 exposed to 12 cercariae per day for four consecutive days. Cercarial penetration was observed  
145 under a dissecting microscope and the containers were examined every half hour to ensure that  
146 no free swimming cercariae remained. A total of 800 tadpoles were tested requiring 20 randomly  
147 selected tadpoles from each clutch for each treatment (20 tadpoles per clutch  $\times$  5 pesticide  
148 treatments  $\times$  2 trematode treatments  $\times$  4 clutches = 800 tadpoles). After exposure to the  
149 cercariae, 20 tadpoles of each treatment regime were assigned to one of 10 glass aquaria (15 x 15  
150 x 25 cm) containing 2 L of one of the five test solutions (dechlorinated tap water or 0.5 ppm of  
151 chlorpyrifos, dimethoate, glyphosate, or propanil). The tadpoles were raised in the same test

152 medium until metamorphosis. The test solution was renewed once a week and temperature and  
153 pH were maintained between 26 and 30° C and 6.5 and 7.0, respectively under a natural  
154 photoperiod of approximately 12:12 h.

155

#### 156 *Data collection and analyses*

157 Tadpole mortality, forelimb emergence (stage 42, [52]), and metamorphosis were assessed daily.  
158 When dead tadpoles were noticed, they were removed and preserved in 70% alcohol. Snout vent  
159 length (SVL) to nearest 0.01 cm and body mass to nearest 0.001 g were recorded at  
160 metamorphosis. Malformations were reported at 10 and 30 days post hatching for larvae and at  
161 metamorphosis. Malformations were identified and categorized according to Meteyer [53], and  
162 severely malformed metamorphs were euthanized with MS-222 and preserved. All procedures  
163 described herein were approved by the Animal Ethical Review Committee (AERC/06/12) at the  
164 Postgraduate Institute of Science, University of Peradeniya.

165 Data were analyzed using Statistica (version 6) software (Statsoft, Tulsa, OK). We used  
166 binomial regression to test whether temporal block and the main and interactive effects of pesticide  
167 and cercarial treatments affected the proportion of frogs that survived in each tank. The binomial  
168 error distribution was further used to assess how the treatments affected malformation frequency  
169 of 10 days post-hatching. We used a general linear model to test whether the effect of temporal  
170 block and the main/interactive effects of pesticide and cercarial treatments affected the SVL, mass  
171 at metamorphosis, TE50 [day that 50% of the animals in a tank had forelimb emergence-stage 42],  
172 and days to metamorphosis. Because all 20 tadpoles were reared in a single tank in each temporal  
173 block, we used the mean of each tank as the replicate and thus each treatment had four replicates



174 total for these analyses. If any main effect or interaction were significant, a Fisher's least  
175 significant difference (LSD) Posthoc test was conducted to evaluate which treatments differed  
176 from one another. If temporal block was not significant, it was dropped from the statistical model.

177

## 178 **RESULTS**

179 All the cercariae penetrated each tadpole because none remained in the vials at the end of  
180 exposure. Hence, attempted infections appear to be the same across pesticide treatments.

### 181 *Survival of the tadpoles*

182 Both the effect of pesticide treatment (Main effect:  $\chi^2_4 = 54.53$ ,  $p = 0.0001$ ) and cercariae (Main  
183 effect:  $\chi^2_1 = 46.31$ ,  $p = 0.0001$ ; Fig 1a) increased tadpole mortality (Fig. 1A). In the absence of  
184 cercariae, all four pesticides significantly increased mortality (Fig. 1A). Tadpoles exposed to  
185 chlorpyrifos, dimethoate, glyphosate, and propanil had 6.50, 7.75, 7.75, and 4.25 times the  
186 mortality as those exposed to the pesticide control (Fig. 1A). In the absence of pesticides,  
187 tadpoles exposed to cercariae had 6.75 times the mortality as those not exposed to cercariae (Fig.  
188 1A). There also was an interaction between pesticide and cercarial treatments on the probability  
189 of death ( $\chi^2_1 = 11.02$ ,  $p = 0.026$ , Fig. 1A). This interaction was caused mostly by the combination  
190 of herbicides and cercariae having a less than additive effect on mortality (Fig. 1A).

### 191 *Malformations of tadpoles and metamorphs*

192 Ten days after metamorphosis, tadpoles had significantly more malformations with than without  
193 pesticides (Main effect:  $\chi^2_4 = 40.11$ ,  $p = 0.0001$ ) and with than without cercariae (Main effect:  
194  $\chi^2_1 = 138.33$ ,  $p = 0.0001$ ; Fig. 1B). None of the individuals in the absence of both cercariae and  
195 pesticides had malformations (Fig. 1B). In the absence of cercariae, chlorpyrifos, glyphosate,

196 dimethoate, and propanil induced malformations in 24, 20, 16, and 16% of the tadpoles,  
197 respectively (Fig. 1B). In the absence of pesticides, cercariae induced malformations in 53% of  
198 the tadpoles (Fig.1B). Importantly, the effect of cercariae on malformation incidence depended  
199 on the pesticide treatment (Pesticide x cercariae:  $\chi^2_4 = 28.10$ ,  $p < 0.001$ ). Dimethoate, glyphosate,  
200 and propanil reduced the number of cercarial-induced malformations relative to the control and  
201 chlorpyrifos treatments (Fig. 1B). The malformations observed were scoliosis (vertebral column  
202 curvature, lateral deviation in the normally straight spine), kyphosis (hunched back, abnormal  
203 convexing of the spine), and edema.

#### 204 *Size at metamorphosis*

205 Despite affecting toad survival and malformations, we did not detect any effects of pesticide or  
206 cercarial treatments on body mass (Pesticide:  $F_{4,30}=0.87$ ,  $p=0.494$ , Cercariae:  $F_{1,30}=0.48$ ,  $p$   
207  $=0.492$ , Interaction:  $F_{4,30}=0.24$ ,  $p =0.914$ ; Fig. 2A) or SVL at metamorphosis (Pesticide:  
208  $F_{4,30}=0.16$ ,  $p =0.956$ , Cercariae:  $F_{1,30}=0.42$ ,  $p =0.520$ , Interaction:  $F_{4,30}=1.32$ ,  $p =0.284$ ; Fig. 2B)  
209 .

#### 210 *Developmental rate*

211 Days until 50% of the metamorphs had forelimb emergence and days to metamorphosis were  
212 significantly increased by exposure to pesticides (Main effect:  $F_{4,30}=3.97$ ,  $p =0.011$ ;  $F_{4,30}=4.28$ ,  $p$   
213  $=0.007$ , respectively) and cercariae (Main effect:  $F_{1,30}=12.48$ ,  $p =0.001$ ;  $F_{1,30}=30.10$ ,  $p <0.001$ ,  
214 respectively, Fig. 3A, B). In the absence of cercariae, tadpoles exposed to chlorpyrifos,  
215 glyphosate, dimethoate, and propanil took 3.7, 5.1, 1.3, and 0.8 more days to metamorphose,  
216 respectively, relative to control tadpoles (Fig. 3B). In the absence of pesticides, tadpoles  
217 exposed to cercariae took 10.5 more days to metamorphose relative to those not exposed to  
218 cercariae (Fig. 3B). Additionally, the effect of cercariae on days until 50% of the frogs had

219 forelimb emergence and days to metamorphosis depended on the pesticide treatment (Pesticide x  
220 cercariae:  $F_{4,30}=2.95$ ,  $p=0.036$ ;  $F_{4,30}=4.09$ ,  $p=0.009$ , respectively). This was because cercariae  
221 increased and decreased development time in the presence of chlorpyrifos and dimethoate,  
222 respectively, relative to the pesticide control (Fig. 3A, B).

## 223 **DISCUSSION**

224 Exposure to cercariae of *A. burminis* alone and the four pesticides alone significantly increased  
225 mortality and malformations in the Asian common toad compared to the water control. However,  
226 individual chemicals interacted with the parasites in different ways. Exposure to the cercariae in  
227 the presence of the two insecticides (chlorpyrifos and dimethoate) additively enhanced the  
228 effects on mortality induced by either treatment alone. However, exposure to the cercariae in the  
229 presence of the herbicides resulted in an antagonistic interaction where survival in the combined  
230 treatment was less than additive. Moreover, the effect of cercariae on malformation incidence  
231 depended on the pesticide treatment. Dimethoate, glyphosate, and propanil reduced the number  
232 of cercarial-induced malformations relative to the control and chlorpyrifos treatments.

233 In contrast to the current study, in a previous study on common hourglass tree frog  
234 tadpoles, the combined exposure of pesticides and cercariae resulted in a marked reduction in  
235 survival and significantly elevated levels of malformations compared to the lone exposures [45].  
236 Differences in the traits of the Asian common toad and hourglass tree frog might explain these  
237 differences. The Asian common toad has thick, dry skin and the adults are nocturnal, terrestrial  
238 habitat generalists found frequently in human-altered agricultural and urban areas. The  
239 hourglass tree frog has thin skin and is an arboreal species found mostly in agricultural land,  
240 home gardens, houses, and other buildings. The differences in their skin are even visible at the

241 tadpole stage, as tadpoles of the toad have thick dark skin and those of the frog have thin light  
242 skin.

243 Pesticide and cercarial treatments affected developmental traits of toads. There was no  
244 difference in the size of the tadpoles exposed to either cercariae or pesticides or both compared  
245 to the size of tadpoles in the water control. However, significant lengthening of the  
246 developmental period (i.e. days until 50% of the frogs had forelimb emergence and days to  
247 metamorphosis) was observed for tadpoles exposed to pesticides, cercariae, or both compared to  
248 the water control. Moreover, the effect of cercariae on the growth period depended on the  
249 pesticide treatment. Relative to the control, cercariae increased the developmental period in the  
250 presence of chlorpyrifos and decreased development in the presence dimethoate. In contrast to  
251 our results, Jayawardena et al. [45] discovered that the same combined cercarial and pesticide  
252 treatments as we used here significantly lengthened the growth period and reduced growth rates  
253 in the common hourglass tree frog relative to the two treatments alone.

254 The enhanced effect of pesticides on trematode disease severity might be due to  
255 impairment of the amphibian immune system. Immunosuppressive effects of pesticides have  
256 been reported in various studies [2, 40, 54-58]. Exact mechanisms of these immunosuppressive  
257 effects are unknown. However, Edge *et al.* [8] suggested that pesticides, particularly glyphosate,  
258 may affect skin peptides that can provide an important barrier to infections. Similarly, Gible  
259 and Baer [59] reported that the in-vitro activity of antimicrobial peptides was reduced by  
260 agricultural runoff containing the herbicide atrazine [59]. In several other instances, pesticide  
261 exposure was associated with decreased melanomacrophage activity in the liver [60], reduced  
262 spleen cellularity [61], decreased lymphocyte proliferation [58], decreased white blood cell  
263 counts [62], and elevated parasite prevalence [41,42, 56, 60]. On the other hand, pesticides may

264 indirectly increase susceptibility to parasite infection by decreasing activity patterns [63] given  
265 that tadpoles can avoid free-swimming parasites by moving away from cercariae or swimming in  
266 erratic patterns [64, 65]. However, in the present study, tadpole ability to behaviorally avoid  
267 cercariae was controlled by exposing the tadpoles to parasites in a small volume of water where  
268 all the parasites successfully penetrated the tadpole, forcing them to rely primarily on  
269 physiological defenses, such as immune responses [66].

270         None of the pesticides tested in the present study had any detrimental effect on trematode  
271 survival. Raffel *et al.* [66] measured the effects of atrazine, glyphosate, carbaryl, and malathion  
272 on embryo and miracidium (free-living stage) survival of *Echinostoma trivolvis*, a common  
273 trematode of amphibians, and found no evidence of effects of these pesticides at ecologically  
274 relevant concentrations. In addition, the survival of renicolid cercariae improved with increasing  
275 concentrations of the common herbicide glyphosate, with cercariae living about 50% longer in  
276 3.6 mg a.i. L<sup>-1</sup> of glyphosate than in control conditions [66]. In addition, several studies [e.g., 70-  
277 74] have examined the effect of pollutants on either the output of cercariae from snails or their  
278 subsequent survival. For instance, Kelly *et al.* [60] recently showed that the New Zealand snail  
279 *Potamopyrgus antipodarum* released approximately three times more *Telogaster opisthorchis*  
280 cercariae per day when exposed to glyphosate than when kept in glyphosate-free water. In many  
281 cases, exposure to pollutants, such as metals, pesticides, and herbicides, reduces replication of  
282 trematodes within snails [67, 68] or their rate of emergence from snails [46, 69]. However, some  
283 studies report reduced virulence of trematode infections in the presence of chemicals. For  
284 instance, Koprivnikar *et al.* [70] showed that trematode cercariae exposed to atrazine has less  
285 success in infesting the tadpoles than those in the control groups.

286 As described by Rohr *et al.* [4], the majority of *Acanthostomum* cercariae crawl towards  
287 the cloacal vent and form cysts in the crease between the body and tail, where limb buds are  
288 located. However, *A. burminis* does not appear to be as virulent as the more well-known  
289 *Ribeiroia ondatrae* that also causes amphibian limb deformities. Unlike *Ribeiroia*,  
290 *Acanthostomum* cysts are not visible as swollen lumps, perhaps because of their smaller size  
291 [71]. Apparently, *Ribeiroia* cysts average 300-350  $\mu\text{m}$  in length (excysted metacercariae, 500-  
292 650  $\mu\text{m}$  and adult 4160-5250  $\mu\text{m}$  in length; [71]), whereas *Acanthostomum* cercariae average 216  
293  $\mu\text{m}$  in length. Size of cercariae has been suggested to affect the virulence of trematode infections  
294 [4], with larger metacercariae presumably causing more tissue damage, eliciting greater immune  
295 responses, and consuming more host resources.

296 In the field, combinations of pesticides and trematodes may have adverse or beneficial  
297 effects on amphibian populations. Pesticides may enhance snail population densities or  
298 immunosuppress hosts, thereby promoting deadly amphibian infections [32, 41, 60]. Mesocosm  
299 studies conducted by Rohr and colleagues [34] revealed that atrazine increases algal and snail  
300 biomass and increases trematode loads in immunosuppressed *Rana pipiens* tadpoles. In the  
301 present study, exposures to cercariae in the presence of the two insecticides further reduced host  
302 survival relative to the cercariae or insecticides alone. In contrast, herbicides had less than  
303 additive effects on mortality associated with cercarial exposures.

304 In many instances, pesticide concentrations in waterbodies are too low to cause direct  
305 amphibian mortality. However, their interactions with other biotic and abiotic factors can induce  
306 substantial amphibian mortality, as shown in the current study. Hence, the effects of multiple  
307 stressors must be more thoroughly considered in ecological risk assessments of wildlife [72].

308 **List of abbreviations**

309 General linear model (GLM), Snout vent length (SVL), Time to metamorphosis (TE50)

310 **Declarations**

- 311 • Ethics approval and consent to participate

312 Authors declare that the experiments conducted, complied with the current laws of Sri  
313 Lanka. Approval was obtained for the collection of wildlife specimens from the protected  
314 areas, and for conducting animal research, from the Department of Wildlife Conservation,  
315 Sri Lanka and from the Ethics Review Committee, Postgraduate Institute of Science,  
316 University of Peradeniya, respectively. Hence, all experiments conducted were in  
317 compliance with ethical guidelines provided by these two authorities.

318

- 319 • Consent for publication

320 Not applicable

- 321 • Availability of data and material

322 The data sets supporting the results of this article are included within the article and its  
323 additional files.

- 324 • Competing interests

325 The authors declare that there is no conflict of interest.

- 326 • Funding

327 Financial support was provided by the National Science Foundation of Sri Lanka  
328 (NSF/2005/EB/02 to R.S.R.)

- 329 • Authors' contributions

330 UA carried out the study under the guidance of RS, AN, and PH. JRR guided in analyses  
331 and interpreting the results. UA drafted the manuscript and RS, JRR and PH reviewed it  
332 before the initial submission. All authors read and approved the final manuscript.

333 • Acknowledgements

334 Authors thank V. Imbuldeniya and Y.G. Ariyaratne of the Department of Zoology,  
335 University of Peradeniya for technical assistance.

336 **References**

- 337 1. Houlahan JE, Findlay CS, Schmidt BR, Meyer AH, Kuzmin SL. Quantitative evidence  
338 for global amphibian population declines. *Nature* 2000; 404: 752–755.
- 339 2. Hayes TB, Falso P, Gallipeau S, Stice M. The cause of global amphibian declines: a  
340 developmental endocrinologist’s perspective. *J Exp Biol* 2010; 213: 921-933.
- 341 3. Davidson C. Declining downwind: amphibian population declines in California and  
342 historical pesticide use. *Ecol Appl.* 2004; 14: 1892–1902.
- 343 4. Rohr JR, Raffel TR, Sessions SK. Digenetic trematodes and their relationship to  
344 amphibian declines and deformities. In *Amphibian Biology. Vol 8 Amphibian Decline:*  
345 *Diseases, Parasites, Maladies and Pollution.* Series Editor Heatwole, H & Wilkinson,  
346 J.W. Surrey Beatty & Sons, Chipping Norton, NSW, Australia, 2009. pp 3067-3088.
- 347 5. Schotthoefer AM, Rohr JR, Cole RA, Koehler AV, Johnson CM, Johnson LB, Beasley  
348 VR. Effects of wetland vs. landscape variables on parasite communities of *Rana pipiens*:  
349 links to anthropogenic factors. *Ecol Appl*, 2011; 21(4): 1257-1271.
- 350 6. McMahon TA, Brannelly LA, Chatfield MW, Johnson PT, Joseph MB, McKenzie VJ, et  
351 al. Chytrid fungus *Batrachochytrium dendrobatidis* has non-amphibian hosts and releases



- 352 chemicals that cause pathology in the absence of infection. Proc Natl Acad Sci, USA.  
353 2013; 110(1): 210-215.
- 354 7. Rohr JR, Raffel TR, Halstead NT, McMahon TA, Johnson SA, Boughton RK, Martin  
355 LB. Early-life exposure to a herbicide has enduring effects on pathogen-induced  
356 mortality. Proc Roy Soc Lond B Bio. 2013; 280(1772): 20131502.
- 357 8. Edge CB, Gahl MK, Pauli BD, Thompson DG, Houlahan JE. Exposure of juvenile green  
358 frogs (*Lithobates clamitans*) in littoral enclosures to a glyphosate-based herbicide. Ecotox  
359 Environ Safe. 2011; 74(5): 1363-1369.
- 360 9. Fenelon J, Moore R. Transport of agrichemicals to ground and surface waters in a small  
361 central Indiana watershed. J Environ Qual. 1998; 27: 884-894.
- 362 10. Vogel JR, Majewski MS, Capel PD. Pesticides in rain in four agricultural watersheds in  
363 the United States. J Environ Qual. 2008; 37: 1101-1115.
- 364 11. Davidson C, Mahony N, Struger J, Ng P, Pettit K. Spatial tests of the pesticide drift,  
365 habitat destruction, UV-B, and climate change hypothesis for California amphibian  
366 declines. Conserv Biol. 2002; 16: 1588-1601.
- 367 12. Relyea RA. The lethal impact of Roundup on aquatic and terrestrial amphibians. Ecol  
368 Appl. 2005; 15: 1118-1124.
- 369 13. Relyea RA. A cocktail of contaminants: how mixtures of pesticides at low concentrations  
370 affect aquatic communities. Oecologia. 2009; 159: 363-376.
- 371 14. Rohr JR, Crumrine PW. Effects of an herbicide and an insecticide on pond community  
372 structure and processes. Ecol Appl, 2005; 15(4): 1135-1147.

- 373 15. Rohr JR, Sager T, Sesterhenn TM, Palmer BD. Exposure, post exposure, and density-  
374 mediated effects of atrazine on amphibians: Breaking down net effects into their parts.  
375 Environ Health Perspect. 2006; 114: 46-50.
- 376 16. Storrs SI, Kiesecker JM. Survivorship patterns of larval amphibians exposed to low  
377 concentrations of atrazine. Environ Health Perspect. 2004; 1054-1057.
- 378 17. Howe CM, Berrill M, Pauli BD, Helbing CC, Werry K, Veldhoen N. Toxicity of  
379 glyphosate-based pesticides to four North American frog species. Environ Toxicol Chem.  
380 2004; 23: 1928–1938.
- 381 18. Sparling DW, Fellers GM. Toxicity of two insecticides to California, USA, anurans and  
382 its relevance to declining amphibian populations. Environ Toxicol Chem. 2009; 28:  
383 1696-1703.
- 384 19. Rohr JR, Elskus A, Shepherd B, Crowley P, McCarthy T, Niedzwiecki J, Sager T, Sih A,  
385 Palmer B. Multiple stressors and salamanders: Effects of an herbicide, food limitation,  
386 and hydroperiod. Ecol Appl 2004; 14: 1028-1040.
- 387 20. Gervasi SS, Foufopoulos J. Costs of plasticity: responses to desiccation decrease post-  
388 metamorphic immune function in a pond-breeding amphibian. Funct Ecol. 2008; 22(1):  
389 100-108.
- 390 21. Carey C, Cohen N, Rollins-Smith L. Amphibian declines: an immunological perspective.  
391 Develop Comp Immunol. 1999; 23: 459–472.
- 392 22. Berger L, Speare R, Daszak P, Green D, Cunningham A. Chytridiomycosis causes  
393 amphibian mortality associated with population declines in the rain forests of Australia  
394 and Central America. Proc Natl Acad Sci. USA. 1998; 95: 9031-9036.

- 395 23. Daszak P, Berger L, Cunningham AA, Hyatt AD, Green DE, Speare R. Emerging  
396 infectious diseases and amphibian population declines. *Emerg Infect Dis.* 1999; 5:735-  
397 748.
- 398 24. Stuart S, Chanson J, Cox N, Young B, Rodrigues A, Fischman D, Waller R. Status and  
399 trends of amphibian declines and extinctions worldwide. *Science.* 2004; 306: 1783-1786.
- 400 25. Johnson PT, Lunde KB, Zelmer DA, Werner JK. Limb deformities as an emerging  
401 parasitic disease in amphibians: evidence from museum specimens and resurvey  
402 data. *Conserv Biol.* 2003; 17(6): 1724-1737.
- 403 26. Skelly DK, Bolden SR, Holland MP, Freidenburg LK, Friedenfelds NA, Malcolm TR.  
404 Urbanization and disease in amphibians. *Disease Ecology: Community Structure and*  
405 *Pathogen Dynamics.* 2006; 153-167.
- 406 27. Fried B, Pane PL, Reddy A. Experimental infection of *Rana pipiens* tadpoles with  
407 *Echinostoma trivolvis* cercariae. *Parasitol Res,* 1997; 83(7): 666-669.
- 408 28. Johnson PTJ, Sutherland DR. Amphibian deformities and Ribeiroia infection: an  
409 emerging helminthiasis. *Trends in Parasitol.* 2003; 19(8): 332-335.
- 410 29. Sessions SK, Franssen R A, Horner VL. Morphological clues from multilegged frogs: are  
411 retinoids to blame? *Science.* 1999; 284(5415): 800-802.
- 412 30. Johnson PT, Lunde KB, Ritchie EG, Launer AE. The effect of trematode infection on  
413 amphibian limb development and survivorship. *Science.* 1999; 284(5415): 802-804.
- 414 31. Sessions SK. What is causing deformed amphibians. *Amphibian conservation.*  
415 Washington, DC: Smithsonian Press. 2003. p, 168-186.

- 416 32. Johnson PTJ, Chase JM, Dosch KL, Hartson RB, Gross JA, Larson DJ, Sutherland DR,  
417 Carpenter SR. Aquatic eutrophication promotes pathogenic infection in amphibians. Proc  
418 Natl Acad Sci. USA 2007; 104: 15781– 15786.
- 419 33. Beasley VR, Faeh SA, Wikoff B, Staehle C, Eisold J, Nichols D, Brown, LE. Risk factors  
420 and declines in northern cricket frogs (*Acris crepitans*). In Amphibian Declines: The  
421 Status of United States Species. MJ Lannoo (ed.). University of California Press,  
422 Berkeley, 2004; 75-86.
- 423 34. Rohr JR, Schotthoefer AM, Raffel TR, Carrick HJ, Halstead N, Hoverman JT, Johnson  
424 CM, Johnson LB, Lieske C, Piwoni MD. Agrochemicals increase trematode infections in  
425 a declining amphibian species. Nature. 2008a; 455: 1235–1239.
- 426 35. Johnson PT, Townsend AR, Cleveland CC, Glibert PM, Howarth RW, McKenzie VJ, et  
427 al., Linking environmental nutrient enrichment and disease emergence in humans and  
428 wildlife. Ecol Appl 2010; 20(1): 16-29.
- 429 36. Rajakaruna RS, Piyatissa PMJR, Jayawardena UA, Navaratne AN, Amerasinghe PH.  
430 Trematode infection induced malformations in the common hourglass treefrogs. J Zool.  
431 2008; 275: 89-95.
- 432 37. Jayawardena UA, Rajakaruna RS, Navaratne AN, Amerasinghe PH. Toxicity of  
433 pesticides exposure on common hourglass tree frog, *Polypedates cruciger*. Int J Agri  
434 Biol. 2010a; 12: 641–648.
- 435 38. Jayawardena UA, Rajakaruna RS, Navaratne A, Amerasinghe PH. Trematode induced  
436 malformations in amphibians: effect of infection at pre limb bud stage tadpoles of  
437 *Polypedates cruciger*. J Nat Sci Found. 2010b; 38:241-248.

- 438 39. Jayawardena UA, Navaratne AN, Amerasinghe PH, Rajakaruna RS. Acute and chronic  
439 toxicity of four commonly used agricultural pesticides on the common toad, *Bufo*  
440 *melanostictus*. J Nat Sci Found. 2011; 39(3): 267-276.
- 441 40. Jayawardena UA, Navaratne AN, Amerasinghe PH, Rajakaruna RS. Malformations and  
442 mortality in the Asian Common Toad induced by exposure to pleurolophocercous  
443 cercariae (Trematoda: Cryptogonimidae). Parasitol Int. 2013; 62:246-252.
- 444 41. Kiesecker JM. Synergism between trematode infection and pesticide exposure: a link to  
445 amphibian limb deformities in nature? Proc Natl Acad Sci. 2002; 99(15), 9900-9904.
- 446 42. Budischak SA, Belden LK, Hopkins WA. Effects of malathion on embryonic  
447 development and latent susceptibility to trematode parasites in ranid tadpoles. Environ  
448 Toxicol Chem. 2008; 27: 2496-2500.
- 449 43. Budischak SA, Belden LK, Hopkins WA. Relative toxicity of malathion to trematode-  
450 infected and noninfected *Rana palustris* tadpoles. Arch Environ Contam Toxicol. 2009;  
451 56(1): 123-128.
- 452 44. Rohr JR, Raffel TR, Sessions SK, Hudson PJ. Understanding the net effects of pesticides  
453 on amphibian trematode infections. Ecol Appl, 2008b; 18(7): 1743-1753.
- 454 45. Jayawardena UA, Rohr J, Nawaratne AN, Amerasinghe PH, Rajakaruna RS. Combined  
455 effect of Pesticides and trematode infections on amphibian survival, growth and  
456 malformations in hourglass tree frog *Polypedates cruciger*. *EcoHealth*. 2016; 13:111-22
- 457 46. Morley NJ, Irwin SWB, Lewis JW. Pollution toxicity to the transmission of  
458 larval digeneans through their molluscan hosts. Parasitology, 2013; 126: S5–S26.
- 459 47. Pietroock M, Marcogliese DJ. Free-Living Endo helminth Stages: at the Mercy of  
460 Environmental Conditions. Trend Parasitol. 2003; 19:293-299.

- 461 48. Blanar CA, Munkittrick KR, Houlahan J, MacLatchy DL, Marcogliese DJ. Pollution and  
462 parasitism in aquatic animals: a meta-analysis of effect size. *Aqua Toxicol.* 2009; 93(1):  
463 18-28.
- 464 49. Jayawardena UA, Rajakaruna RS, Amerasinghe PH. Cercariae of trematodes in  
465 freshwater snails in three climatic zones in Sri Lanka. *Ceylon Journal of Science*  
466 (Biological Sciences), 2011; 39(2).
- 467 50. Aponso GLM, Magamage C, Ekanayake WM, Manuweera GK. Analysis of water for  
468 pesticides in two major agricultural areas of the dry zone. *Annals of the Sri Lanka*  
469 *Department of Agriculture*, 2003; 5: 7-22.
- 470 51. Wijesinghe MR. Ecotoxicology: Why is it a discipline of growing importance? *Proc Inst*  
471 *Biol, Sri Lanka.* 2012.
- 472 52. Gosner KL. A simplified table for staging anuran embryos and larvae with notes on  
473 identification. *Herpetologica.* 1960; 16(3): 183-190.
- 474 53. Meteyer CU. Field guide to malformations of frogs and toads: with radiographic  
475 interpretations (No. 2000-0005). US Fish and Wildlife Service. 2000. pp. 1-20
- 476 54. Taylor SK, Williams ES, Mills KW. Effects of malathion on disease susceptibility in  
477 Woodhouse's toads. *J Wild Dis.* 1999; 35:536-541.
- 478 55. Christin MS, Gendron AD, Brousseau P, Menard L, Marcogliese DJ, Cyr D, Ruby S,  
479 Fournier M. Effects of agricultural pesticides on the immune system of *Rana pipiens* and  
480 on its resistance to parasitic infection. *Environ Toxicol Chem.* 2003; 22:1127-1133.
- 481 56. Gilbertson MK, Haffner GD, Drouillard KG, Albert A, and Dixon B. Immunosuppression  
482 in the northern leopard frog (*Rana pipiens*) induced by pesticide exposure. *Environ*  
483 *Toxicol Chem.* 2003; 22:101-110.

- 484 57. Lewis J, Hoole D, Chappell LH. Parasitism and environmental pollution: parasites and  
485 hosts as indicators of water quality. *Parasitology*. 2003; 126:S1-S3.
- 486 58. Christin MS, Menard L, Gendron AD, Ruby S, Cyr D, Marcogliese DJ, Rollins-Smith L.  
487 Fournier M. Effects of agricultural pesticides on the immune system of *Xenopus laevis*  
488 and *Rana pipiens*. *Aqua Toxicol*. 2004; 67: 33-43.
- 489 59. Gible RE, Baer KN. Effects of atrazine, agricultural runoff, and selected effluents on  
490 antimicrobial activity of skin peptides in *Xenopus laevis*. *Ecotox Environ Safe*, 2011;  
491 74(4): 593-599.
- 492 60. Kelly DW, Poulin R, Tompkins DM, Townsend CR. Synergistic effects of glyphosate  
493 formulation and parasite infection on fish malformations and survival. *J Appl Ecol*. 2010;  
494 47: 498–504.
- 495 61. Forson D, Storfer A. Effects of atrazine and iridovirus infection on survival and life-  
496 history traits of the long-toed salamander (*Ambystomama crodatylum*). *Environ Toxicol*  
497 *Chem*. 2006; 25: 168-173.
- 498 62. Bridges CM, Semlitsch RD. Variation in pesticide tolerance of tadpoles among and  
499 within species of Ranidae and patterns of amphibian decline. *Conserv Biol*. 2000;  
500 14:1490-1499.
- 501 63. Thiemann GW, Wassersug RJ. Patterns and consequences of behavioral responses to  
502 predators and parasites in *Rana* tadpoles. *Biol J Linn Soc*. 2000; 71:513-528.
- 503 64. Rohr JR, Civitello DJ, Crumrine PW, Halstead NT, Miller AD, Schotthoefer AM,  
504 Stenoien C, Johnson LB, Beasley VR. Predator diversity, intraguild predation, and  
505 indirect effects drive parasite transmission. *Proc Natl Acad Sci, USA*. 2015; 112 (10):  
506 3008-3013.

- 507 65. Rohr JR, Swan A, Raffel TR, Hudson PJ. Parasites, info-disruption, and the ecology of  
508 fear. *Oecologia*. 2009; 159:447-454.
- 509 66. Raffel TR, Sheingold JL, Rohr JR. Lack of pesticide toxicity to *Echinostoma trivolvis*  
510 eggs and miracidia. *J Parasitol*. 2009; 95(6): 1548-1551.
- 511 67. Yescott RE, Hansen EL. Effect of manganese on *Biomphalaria glabrata* infected with  
512 *Schistosoma mansoni*. *J Invert Path*. 1976; 28: 315–320.
- 513 68. Stopper G F, Hecker L, Franssen RA, Sessions SK. How trematodes cause limb  
514 deformities in amphibians. *J Exper Zool*. 2002; 294(3): 252-263.
- 515 69. Hira P, Webbe G. The effect of sublethal concentrations of the molluscicide triphenyl  
516 lead acetate on *Biomphalaria glabrata* (Say) and on the development of *Schistosoma*  
517 *mansoni* in the snail. *J Helminthol*. 1972; 46: 11–26.
- 518 70. Koprivnikar J, Forbes MR, Baker RL. Effects of atrazine on cercarial longevity, activity,  
519 and infectivity. *J Parasitol*. 2006; 92: 306–311.
- 520 71. Müller R, Baker JR. *Medical parasitology*. Lippincott Williams & Wilkins. 1990.
- 521 72. Rohr JR, Salice CJ, Nisbet RM. The pros and cons of ecological risk assessment based on  
522 data from different levels of biological organization. *Crit Rev Toxicol*. 2016; 46:756-784.



Table 1. Active ingredient, surfactant and commercial name of the four pesticides used

| <b>Active ingredient and strength</b>                                           | <b>Surfactant/solvent</b>          | <b>Trade name</b>                                 |
|---------------------------------------------------------------------------------|------------------------------------|---------------------------------------------------|
| Chlorpyrifos [O,O-DiethylO-(3,5,6-trichloro-2-pyridyl) phosphorothioate] 400g/L | Xylene                             | Lorsban 40 EC <sup>®</sup> or Pattas <sup>®</sup> |
| Dimethoate (O,O-Dimethyl phosphorodithioate) 400 g/L                            | Water                              | Dimethoate 40EC <sup>®</sup>                      |
| Glyphosate [N-(Phosphonomethyl) glycine] 360 g/L                                | POEA                               | Round Up <sup>®</sup> or Glyphosate <sup>®</sup>  |
| Propanil [N-(3,4-dichlorophenyl) propanamide] 360 g/L                           | Cyclohexanone & petroleum solvents | 3, 4-DPA <sup>®</sup>                             |

Table 2 Experimental design used to test the individual and combined exposure of *Acanthostomum cercariae* and pesticides on *D. melanostictus* tadpoles

| Parasite            | Exposure medium                   |              |            |            |          |
|---------------------|-----------------------------------|--------------|------------|------------|----------|
|                     | Dechlorinated tap water (Control) | Chlorpyrifos | Dimethoate | Glyphosate | Propanil |
| No cercariae        | -                                 | -            | -          | -          | -        |
| Cercariae (12×4=48) | +                                 | +            | +          | +          | +        |

Note: Concentration of 0.5 ppm was used for all four chemicals. 20 tadpoles were tested in each treatment

## Figure legends

Figure 1. Mean proportion ( $\pm$  95% confidence interval,  $n = 4$  tanks) of *D. melanostictus* tadpoles that survived until metamorphosis (a) and that had malformations approximately 10 days post-hatching (b) after the exposure to five treatments (control water, chlorpyrifos, dimethoate, glyphosate and propanil) along with the presence or absence of exposure to cercariae of the trematode *Acanthostomum burminis*. Treatments that do not share letters were deemed significantly different from one another based on none overlapping confidence intervals.

Figure 2. Mean ( $\pm$ SE,  $n = 4$  tanks) mass (A) and snout-vent length (SVL) (B) of *D. melanostictus* toads at metamorphosis when exposed to five treatments (control water, chlorpyrifos, dimethoate, glyphosate and propanil) along with the presence or absence of exposure to cercariae of the trematode *Acanthostomum burminis*. There were no significant main effects of pesticides or cercariae on mass or SVL, nor was there a significant interaction between these predictors.

Figure 3. Mean experimental day when 50% of *D. melanostictus* toads had forelimb emergence (TE50) (A) and mean days to metamorphosis (B) when exposed to five treatments (control water, chlorpyrifos, dimethoate, glyphosate and propanil) crossed with the presence or absence of exposure to cercariae of the trematode *Acanthostomum burminis*. Treatments that do not share letters were deemed significantly different from one another based on a Fisher's LSD post hoc multiple comparison test.

A)

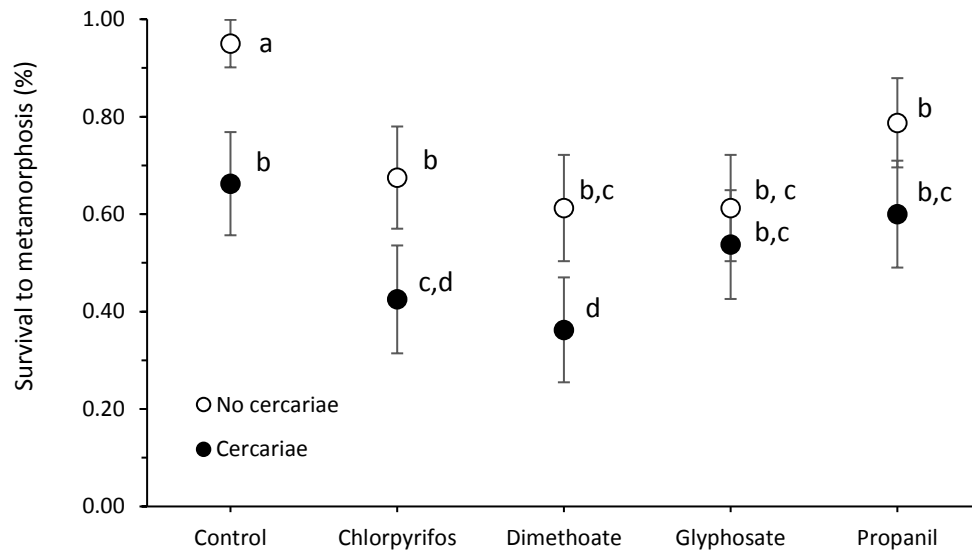

B)

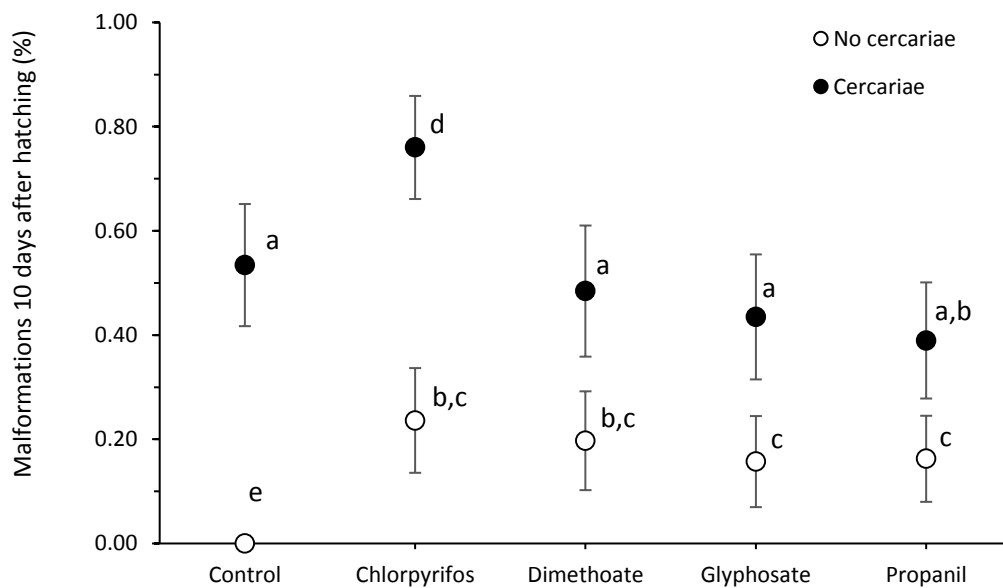

Figure 1. Mean proportion ( $\pm$  95% confidence interval,  $n = 4$  tanks) of *D. melanostictus* tadpoles that survived until metamorphosis (A) and that had malformations approximately 10 days post-hatching (B) after the exposure to five treatments (control dechlorinated water, chlorpyrifos, dimethoate, glyphosate and propanil) along with the presence or absence of exposure to cercariae of the trematode *Acanthostomum burminis*. Treatments that do not share letters were deemed significantly different from one another based on none overlapping confidence intervals.

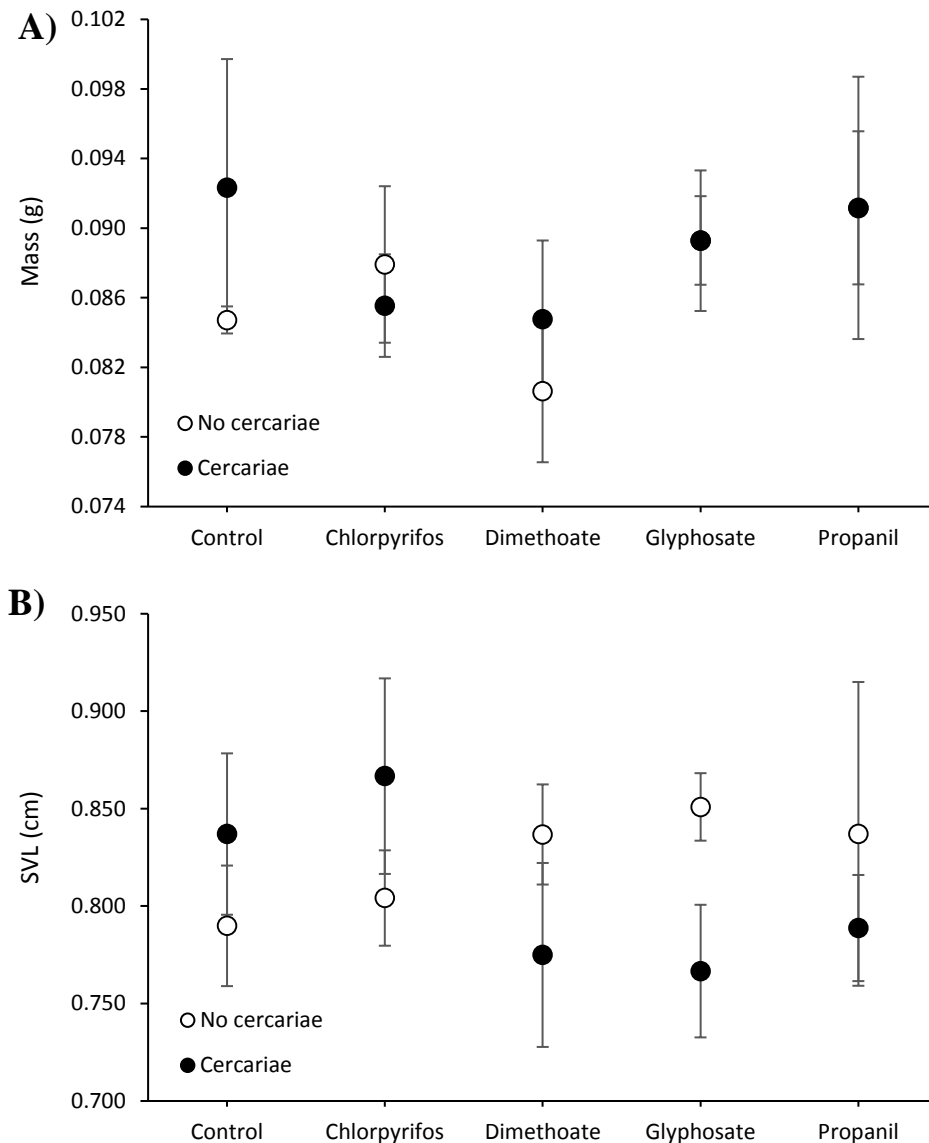

Figure 2. Mean ( $\pm$ SE,  $n = 4$  tanks) mass (A) and snout-vent length (SVL) (B) of *D. melanostictus* toads at metamorphosis when exposed to five treatments (control dechlorinated water, chlorpyrifos, dimethoate, glyphosate and propanil) along with the presence or absence of exposure to cercariae of the trematode *Acanthostomum burminis*. There were no significant main effects of pesticides or cercariae on mass or SVL, nor was there a significant interaction between these predictors.

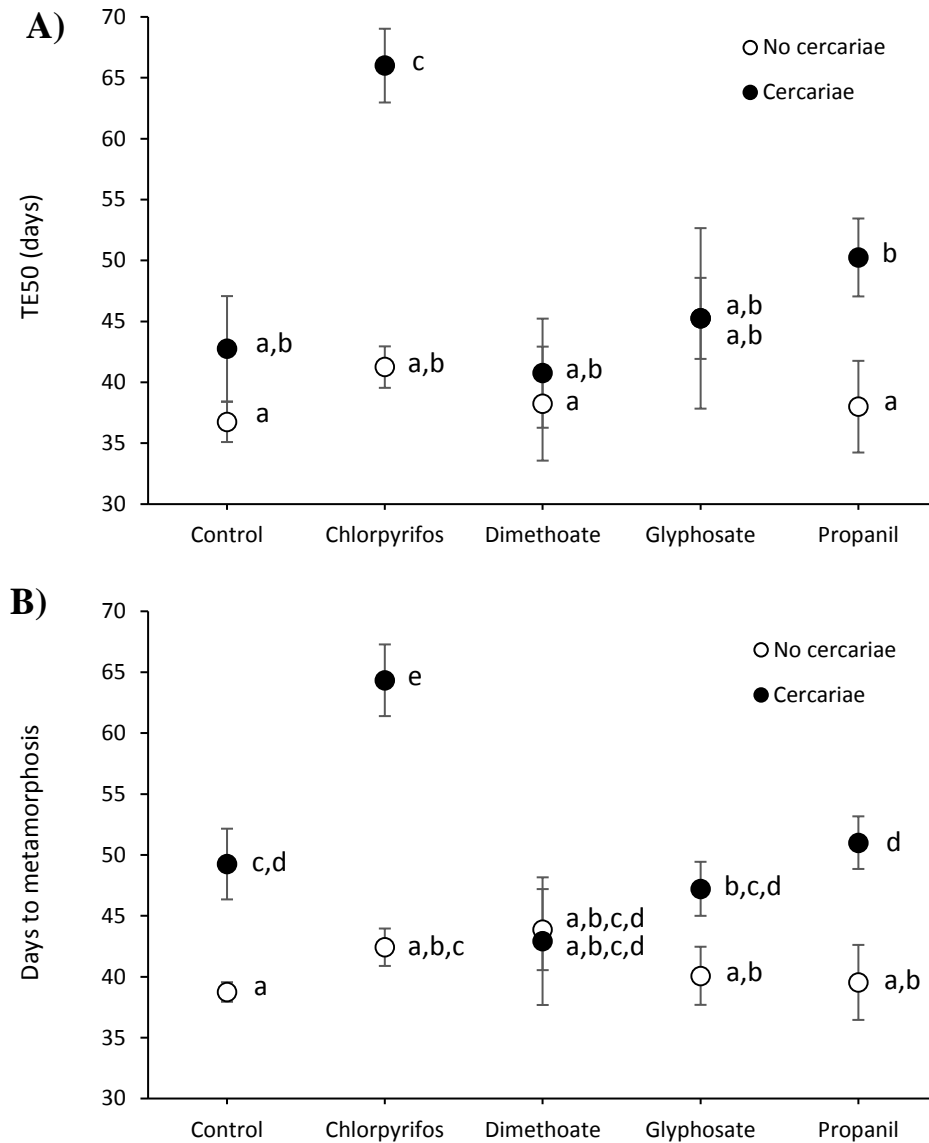

Figure 3. Mean experimental day when 50% of *D. melanostictus* toads had forelimb emergence (TE50) (A) and mean days to metamorphosis (B) when exposed to five treatments (control dechlorinated water, chlorpyrifos, dimethoate, glyphosate and propanil) crossed with the presence or absence of exposure to cercariae of the trematode *Acanthostomum burminis*. Treatments that do not share letters were deemed significantly different from one another based on a Fisher's LSD post hoc multiple comparison test.
